# Supplementary material for: Spatial proteogenomics reveals distinct and evolutionarily-conserved hepatic macrophage niches
Source: bioRxiv or medRxiv preprint supplement (doi:10.1101/2021.10.15.464432), 2021-10-16
Supplement: Supplementary file [file media-8.pdf]

| Sample Number | Flow | Biopsy used for                                    | Gender | Age     | Weight  | Height  | Reason for hospitalization                                   | Procedure                                      | Concomitant medication                                                                                                                                                                                                                                                                                                                                                                                        | Concomitant disorders/operations                                                                                                                                                                                                                                                                                                                                                                                      | Alcohol intake           | Steatosis                                          | Fibrosis                        |
|---------------|------|----------------------------------------------------|--------|---------|---------|---------|--------------------------------------------------------------|------------------------------------------------|---------------------------------------------------------------------------------------------------------------------------------------------------------------------------------------------------------------------------------------------------------------------------------------------------------------------------------------------------------------------------------------------------------------|-----------------------------------------------------------------------------------------------------------------------------------------------------------------------------------------------------------------------------------------------------------------------------------------------------------------------------------------------------------------------------------------------------------------------|--------------------------|----------------------------------------------------|---------------------------------|
| H01           |      | Flow Cytometry                                     | male   | unknown | unknown | unknown | unknown                                                      | unknown                                        | unknown                                                                                                                                                                                                                                                                                                                                                                                                       | unknown                                                                                                                                                                                                                                                                                                                                                                                                               | unknown                  | unknown                                            | unknown                         |
| H02           |      | CITE-Seq<br>Flow<br>Cytometry                      | male   | unknown | unknown | unknown | Colorectal cancer with liver metastases                      | Liver resection                                | unknown                                                                                                                                                                                                                                                                                                                                                                                                       | unknown                                                                                                                                                                                                                                                                                                                                                                                                               | unknown                  | unknown                                            | unknown                         |
| H03           |      | Flow Cytometry                                     | male   | unknown | unknown | unknown | Liver resection                                              | Liver resection                                | unknown                                                                                                                                                                                                                                                                                                                                                                                                       | unknown                                                                                                                                                                                                                                                                                                                                                                                                               | unknown                  | unknown                                            | unknown                         |
| H04           |      | scRNA-seq<br>Flow Cytometry                        | female | 53y     | 73kg    | 161cm   | Symptomatic cholecystolithiasis                              | Laparoscopic cholecystectomy                   | Zestril (Lisinopril) 10 mg daily<br>Omeprazol 20 mg daily<br>Luteryl (Nomesgestrol) 5 mg daily<br>Simvastatine 20 mg daily<br>Somatuline (Lanreotide) 90 mg once every 4 weeks<br>D-Cure (Colecalciferol) once every 4 weeks                                                                                                                                                                                  | Pituitary macroadenoma -> acromegaly -> endoscopic hypophysectomy<br>Oophorectomy due to cyst<br>Light form of obstructive sleep apnea<br>Hemorrhoids -> rubber band ligation<br>Diabetes mellitus type 2 -> metformine (not in medication overview.)<br>Pulmonary arterial hypertension<br>Diaphragmatic hernia<br>Stage 2 chronic kidney disease<br>Idiopathic polyneuropathy<br>Cystic hygroma -> surgical removal | 1-2 standard units daily | Mild (10-15%);<br>centrilobular;<br>macrosteatosis | No                              |
| H05           |      | Flow Cytometry                                     | male   | 56y     | 79kg    | 176cm   | Colorectal cancer with synchronous multiple liver metastases | Parenchyma-sparing open liver resection        | In advance: 4 cycles of FOLFOX (Leucovorin/Fluorouracil/Oxaliplatin) + panitumumab<br>Cortisone ointment due to chemotherapy-induced rash                                                                                                                                                                                                                                                                     | Low back pain<br>Cervical spondylosis                                                                                                                                                                                                                                                                                                                                                                                 | Unknown                  | Mild (10-15%)                                      | No                              |
| H06           |      | CITE-seq<br>Flow<br>Cytometry                      | male   | 72y     | 87kg    | 174cm   | Relapse of colorectal liver metastases (segment VI/VI)       | Open liver resection                           | In advance: 8 cycles of CAPOX (Capecitabine/Oxaliplatin)                                                                                                                                                                                                                                                                                                                                                      | Colorectal cancer with liver metastases -> laparoscopic sigmoid colectomy + microwave ablation of liver lesions<br>Squamous cell carcinoma -> chemoradiotherapy with Cisplatin/Etoposide                                                                                                                                                                                                                              | Unknown                  | No                                                 | No                              |
| H07           |      | scRNA-Seq<br>Flow<br>Cytometry                     | female | 46y     | 69kg    | 160cm   | Hepatocellular adenoma (segment III)                         | Liver resection with adhesiolysis              | Zaldiar (Tramadol/Paracetamol) 37.5/325 mg daily<br>Livial (Tibolon) 2.5 mg daily<br>Citalopram 20 mg daily<br>Nortrielen (Nortriptyline) 25 mg daily                                                                                                                                                                                                                                                         | Endometriosis -> hysterectomy<br>Oophorectomy of both ovaries<br>Appendectomy<br>Bilateral hydrosalpinx -> salpingectomy<br>Laparoscopic caecectomy<br>Colpopromontoriopexy<br>Total colectomy with ileorectal anastomosis<br>Hypovitaminosis D -> startup of supplements (not in medication overview.)                                                                                                               | Unknown                  | No                                                 | No                              |
| H08           |      | Flow Cytometry                                     | male   | 73y     | 80kg    | 180cm   | Symptomatic cholelithiasis                                   | Laparoscopic cholecystectomy                   | Loortan (Losartan) 50 mg daily<br>Relvar (Fluticason/Vilanterol) 92/22 µg daily                                                                                                                                                                                                                                                                                                                               | Asthma<br>Pulmonary arterial hypertension<br>Granulomatous rosacea                                                                                                                                                                                                                                                                                                                                                    | Social drinker           | No                                                 | No                              |
| H09           |      | Flow Cytometry                                     | male   | 37y     | 90kg    | 188cm   | Colorectal cancer with solitary liver metastasis (segment V) | Laparoscopic resection of                      | 4 cycles of FOLFIRINOX (Leucovorin/ Fluorouracil/Irinotecan/Oxaliplatin)<br>bevacizumab                                                                                                                                                                                                                                                                                                                       | Surgical removal of 6 tubular adenomas with low-grade dysplasia                                                                                                                                                                                                                                                                                                                                                       | Unknown                  | No                                                 | No                              |
| H10           |      | scRNA-seq<br>Flow Cytometry<br>Confocal Microscopy | male   | 55y     | 116kg   | 173cm   | Morbid obesity                                               | Laparoscopic gastric bypass                    | Selozok (Metoprolol) 100 mg daily<br>Zestril (Lisinopril) 20 mg daily<br>Asaflo (Acetylsalicylic acid) 80 mg daily<br>Zocor (Simvastatine) 40 mg daily<br>CetiSandoz (Cetirizine) 10 mg daily                                                                                                                                                                                                                 | Acute myocardial infarction complicated by major arrhythmias -> percutaneous coronary intervention<br>Pulmonary arterial hypertension<br>Hyperlipidemia<br>Intersphincteric abscess                                                                                                                                                                                                                                   | 4 standard units daily   | No                                                 | No                              |
| H11           |      | CITE-Seq<br>Flow<br>Cytometry                      | female | 53y     | 114kg   | 167cm   | Morbid obesity                                               | Laparoscopic gastric bypass                    | L-Thyroxine 175 µg on odd days<br>L-Thyroxine 150 µg on even days<br>Omeprazol 40 mg twice daily<br>Simvastatine 20 mg daily<br>Rivotril (Clonazepam) 2 mg if necessary<br>Mirtazipine 15 mg daily<br>Tramium (Tramadol) 100 mg daily<br>Temesta (Lorazepam) 2.5 mg if necessary<br>Dafilon (Diosmine/Flavonoids) 450/50 mg if necessary                                                                      | Laparoscopic sacropeky<br>Hashimoto's thyroiditis<br>Spinal stenosis -> laminectomy<br>Carpal tunnel release<br>Hepatic steatosis<br>Insomnia<br>Reflux<br>Tremor                                                                                                                                                                                                                                                     | 1 standard unit monthly  | Mild (20%)                                         | Clear pericellular fibrosis     |
| H12           |      | Flow Cytometry                                     | male   | 48y     | 110kg   | 181cm   | Symptomatic cholecystolithiasis                              | Laparoscopic cholecystectomy                   | Paracetamol 20 mg daily<br>Pantomed (Pantoprazol) 40 mg twice daily<br>Spasmonem (Otilonium bromide) 40 mg three times a day                                                                                                                                                                                                                                                                                  | Renal colic<br>Gastro-esophageal reflux disease (Grade A)<br>Several abdominal and dorsal lipomas -> resection<br>Laparoscopic appendectomy with peritonitis                                                                                                                                                                                                                                                          | 3 standard units weekly  | 5% steatosis                                       | Mild pericellular fibrosis      |
| H13           |      | CITE-seq<br>Flow<br>Cytometry                      | male   | 73y     | 107kg   | 172cm   | Symptomatic cholecystolithiasis                              | Laparoscopic cholecystectomy                   | Asaflo (Acetylsalicylic acid) 80 mg daily<br>Bisoprolol 2.5 mg daily<br>D-cure (Colecalciferol) once weekly<br>Ekeox (Vinifaxine) 75 mg daily<br>Glucophage (Metformin) 500 mg twice daily<br>Humalog (Insulin lispro) 10 IU three times daily<br>Lantus (Insulin glargine) 40 IU once daily<br>L-Thyroxine 125 µg daily<br>Lisinopril 5 mg daily<br>Simvastatine 40 mg daily<br>Paracetamol 1 g if necessary | Diabetes mellitus type 2 with micro- and macrovascular complications<br>Bursitis left elbow -> bursectomy<br>Cataract -> surgery<br>Autonomous struma -> total thyroidectomy<br>Syncope with hypoglycemia and hypotension -> hospitalization<br>Chronic kidney disease<br>Prostatitis -> hospitalization<br>Spinal stenosis -> surgery                                                                                | Unknown                  | 5% steatosis                                       | Clear pericellular fibrosis     |
| H14           |      | scRNA-seq<br>Confocal Microscopy<br>Flow Cytometry | female | 75y     | 63kg    | 160cm   | Symptomatic cholecystolithiasis                              | Laparoscopic cholecystectomy                   | Cholecalciferol 10 µg daily<br>Domperidon 10 mg if necessary                                                                                                                                                                                                                                                                                                                                                  | Carpal tunnel release<br>Disturbed glycaemia<br>Hypercholesterolemia<br>Cataract -> surgery                                                                                                                                                                                                                                                                                                                           | Unknown                  | >5% steatosis                                      | Very mild pericellular fibrosis |
| H16           |      | CITE-seq<br>Confocal Microscopy<br>Flow Cytometry  | female | 66y     | 56kg    | 156cm   | Colorectal cancer with liver metastases (segment II/VIII)    | Liver resection with adhesiolysis              | In advance: 4 cycles of FOLFOX (Leucovorin/ Fluorouracil/Oxaliplatin)                                                                                                                                                                                                                                                                                                                                         | Wertheim-Meigs operation (in 1998)                                                                                                                                                                                                                                                                                                                                                                                    | Unknown                  | <5% steatosis                                      | No                              |
| H17           |      | Flow Cytometry                                     | female | 33y     | 64kg    | 178cm   | Symptomatic cholecystolithiasis                              | Laparoscopic cholecystectomy                   | Paracetamol 1 g if necessary<br>Bellina (Ethinylestradiol/Chlormadinone acetate) 0.03/2 mg daily                                                                                                                                                                                                                                                                                                              | Endometriosis                                                                                                                                                                                                                                                                                                                                                                                                         | Unknown                  | No                                                 | Mild pericellular fibrosis      |
| H18           |      | CITE-Seq<br>Flow<br>Cytometry                      | female | 28y     | 52kg    | 157cm   | Hepatocellular adenoma (segment V/VI)                        | Laparoscopic liver resection + cholecystectomy | Movicol (Macrogol + electrolytes) if necessary<br>Paracetamol 1 g if necessary<br>Tradonal (Tramadol) 50 mg if necessary<br>Cleane (Enoxaparin sodium) 40 mg daily                                                                                                                                                                                                                                            | Acne<br>Asthma<br>Hay fever                                                                                                                                                                                                                                                                                                                                                                                           | Unknown                  | No                                                 | Mild pericellular fibrosis      |
| H19           |      | Flow Cytometry                                     | female | 25y     | 67kg    | 160cm   | Colorectal cancer with synchronous diffuse liver metastases  | Liver resection + microwave ablations          | Lindynette 30 (Ethinylestradiol/Gestodene) 0.03/0.075 mg daily<br>Magnesium daily<br>Minocycline 100 mg daily<br>Mometason nasal spray 50 µg twice daily<br>Pantomed (Pantoprazol) 40 mg daily<br>Paracetamol 1 g if necessary<br>Tradonal (Tramadol) 50 mg if necessary<br>In advance: 8 cycles of FOLFOX (Leucovorin/ Fluorouracil/Oxaliplatin) + panitumumab                                               | Unknown                                                                                                                                                                                                                                                                                                                                                                                                               | No                       | No                                                 |                                 |
| H20           |      | Flow Cytometry                                     | female | 51y     | 80kg    | 173cm   | Colorectal cancer with metachronous liver metastases         | Liver resection                                | In the past: adjuvant FOLFOX (Leucovorin/ Fluorouracil/Oxaliplatin)<br>In advance: 8 cycles of FOLFIRINOX (Leucovorin/ Fluorouracil/Irinotecan/Oxaliplatin) + bevacizumab                                                                                                                                                                                                                                     | Diabetes mellitus type 2 with peripheral polyneuropathy<br>Metabolic syndrome<br>Total hysterectomy                                                                                                                                                                                                                                                                                                                   | Unknown                  | 5-10% steatosis                                    | Pericellular fibrosis           |
|               |      |                                                    |        |         |         |         |                                                              |                                                | Amlodipine 5 mg daily<br>Betahistine 16 mg three times daily<br>Mirabegron 25 mg daily                                                                                                                                                                                                                                                                                                                        |                                                                                                                                                                                                                                                                                                                                                                                                                       |                          |                                                    |                                 |

|     |                                                    |        |     |        |         |                                                        |                              |                                                                                                                                                                                                                                                                                                                                                                                                                                                                                                                                                                                                                                |                                                                                                                                                                                     |                        |                 |                                |
|-----|----------------------------------------------------|--------|-----|--------|---------|--------------------------------------------------------|------------------------------|--------------------------------------------------------------------------------------------------------------------------------------------------------------------------------------------------------------------------------------------------------------------------------------------------------------------------------------------------------------------------------------------------------------------------------------------------------------------------------------------------------------------------------------------------------------------------------------------------------------------------------|-------------------------------------------------------------------------------------------------------------------------------------------------------------------------------------|------------------------|-----------------|--------------------------------|
| H21 | scRNA-seq<br>Flow Cytometry                        | female | 77y | 68kg   | 156cm   | Hepatocellular carcinoma (segment II/VII)              | Liver resection              | Acetylsalicylic acid 100 mg daily<br>Clethane (Enoxaparin sodium) 40 mg daily<br>Duloxetine 60 mg daily<br>Deanxit (10 mg melitracen + 0.5 mg flupentixol) once daily<br>Mefenamic 500 mg daily<br>Lormetazepam 1 mg daily<br>Oxydodon 20 mg daily<br>Pantoprazol 40 mg daily<br>Paracetamol 1 g four times daily<br>Prolopa (100 mg levodopa + 25 mg benserazide) three times daily<br>Magnesium 3g daily<br>Simvastatine 40 mg daily                                                                                                                                                                                         | Cholecystectomy<br>Diverticulosis<br>Hemorrhoids<br>Gastric sleeve<br>Parkinson<br>Cystadenocarcinoma --> bilateral ovariectomy and appendectomy + chemotherapy (Endoxan, Platinol) | Unknown                | <5% steatosis   | Cirrhosis                      |
| H22 | scRNA-seq<br>Flow Cytometry                        | female | 55y | 66kg   | 169cm   | Liver injury (segment VI)                              | Laparoscopic liver resection | Unknown                                                                                                                                                                                                                                                                                                                                                                                                                                                                                                                                                                                                                        | Migraine<br>Meningitis                                                                                                                                                              | Unknown                | No              | No                             |
| H23 | scRNA-seq<br>Flow Cytometry                        | female | 75y | 142kg  | 168cm   | Morbid obesity                                         | Roux-en-Y-gastric bypass     | Unknown                                                                                                                                                                                                                                                                                                                                                                                                                                                                                                                                                                                                                        | hypothyroidism<br>appendectomy                                                                                                                                                      | Unknown                | No              | 5-10% fibrosis                 |
| H24 | Flow Cytometry                                     | male   | 58y | 74kg   | 177cm   | Metastasis of colorectal adenocarcinoma (segment VIII) | Liver resection              | Atorvastatine (Lipitor) 40 mg daily<br>Minocycline 100 mg daily<br>Paracetamol 1 g four times daily if necessary<br>Tradolol (Tramadol) 50 mg four times daily if necessary<br>Seretide (50 µg salmeterol + 250 µg fluticasone) one dose daily<br>Ventolin (Salbutamol)<br>Nasonex (mometason) 2 times twice daily<br>Flixonase (fluticasone)<br>Microgynon (30 µg ethinylestradiol + 150 µg levonorgestrel) once daily<br>In advance: 4 cycles of CAPOX (Capecitabine/Oxaliplatin)                                                                                                                                            | Asymptomatic chronic calcifying pancreatitis<br>Nephrolithiasis<br>Lumbar hernia                                                                                                    | Sporadic               | 5-10% steatosis | No                             |
| H25 | scRNA-seq<br>Confocal + RNAScope<br>Flow Cytometry | female | 49y | 99kg   | 176cm   | Symptomatic cholecystolithiasis                        | Laparoscopic cholecystectomy | Ventolin (Salbutamol)<br>Nasonex (mometason) 2 times twice daily<br>Flixonase (fluticasone)<br>Microgynon (30 µg ethinylestradiol + 150 µg levonorgestrel) once daily<br>In advance: 4 cycles of CAPOX (Capecitabine/Oxaliplatin)                                                                                                                                                                                                                                                                                                                                                                                              | Asthma<br>Nasal polyposis grade 3<br>Obesity                                                                                                                                        | No                     | 5-10% steatosis | Minimal pericellular fibrosis  |
| H26 | Confocal + RNAScope                                | male   | 57y | 120kg  | 191cm   | Colorectal cancer with liver metastases                | Liver resection              | Metoprolol<br>Enalapril<br>Atorvastatin                                                                                                                                                                                                                                                                                                                                                                                                                                                                                                                                                                                        | Arrhythmia<br>Sinusitis<br>Arterial hypertension<br>Gout                                                                                                                            | Unknown                | 20% steatosis   | Mild pericellular fibrosis     |
| H29 | Confocal + RNAScope                                | female | 67y | 106kg  | 164cm   | Morbid obesity                                         | Gastric bypass               | Nobiten (nebivolol) 2.5 mg twice daily<br>Entresto (49 mg sacubitril + 51 mg valsartan)<br>Procoralan (ivabradine) 5 mg<br>Pantomed (pantoprazol) 40 mg once daily<br>Cymbalta (duloxetine) 60 mg once daily<br>Zolpidem 10 mg once daily<br>Calcium<br>Mirtazapine 15 mg daily<br>Spirinolactone 25 mg daily<br>Montelukast once daily<br>Relvar (Fluticasone/Vilanterol) 184/22 µg daily<br>Incruse (umeclidinium) once daily<br>Duovent (ipratropium + fenoterol) if necessary<br>Azithromycine 250 mg three times daily<br>Mometasone nasal spray (50 µg) 2 doses once daily<br>Asaflow (Acetylsalicylic acid) 80 mg daily | Osteopenia<br>Hemorrhoids<br>Hysterectomy/ovariectomy<br>Cholecystectomy<br>Gastritis<br>Cardiomyopathy<br>Asthma with persistent bronchial obstruction<br>Depression               | Unknown                | 10% steatosis   | Minimal pericellular fibrosis  |
| H30 | snRNA-seq                                          | female | 64y | 96kg   | 159cm   | Obesity class 2                                        | Gastric Bypass               | Asaflow (Acetylsalicylic acid) 80 mg daily                                                                                                                                                                                                                                                                                                                                                                                                                                                                                                                                                                                     | Appendectomy<br>Cholelithiasis -> cholecystectomy<br>Varicectomy                                                                                                                    | No                     | 15%             | No                             |
| H32 | snRNA-seq                                          | male   | 33y | 123kg  | 174cm   | Obesity class 3                                        | Gastric Bypass               | /                                                                                                                                                                                                                                                                                                                                                                                                                                                                                                                                                                                                                              | /                                                                                                                                                                                   | Unknown                | 50%             | No                             |
| H33 | snRNA-seq                                          | male   | 67y | 82.7kg | Unknown | Liver abscess                                          | Resection                    | Lisinopril 5 mg daily<br>Asaflow (Acetylsalicylic acid) 80 mg daily<br>Paracetamol 1 g if necessary<br>Tradolol (Tramadol) 50 mg if necessary<br>Tresiba (insulin degludec) 16 IU once daily<br>Novorapid (insulin aspart) 10 IU three times daily                                                                                                                                                                                                                                                                                                                                                                             | Cholecystectomy<br>Diabetes mellitus type 1                                                                                                                                         | Unknown                | No              | Mild pericellular fibrosis     |
| H35 | Visium                                             | female | 59y | 102kg  | 159cm   | Obesity class 3                                        | Gastric Bypass               | Co-Bisoprolol (bisoprolol/hydrochlorothiazide) 5/12.5 mg daily<br>Pantoprazol 40 mg daily                                                                                                                                                                                                                                                                                                                                                                                                                                                                                                                                      | Tonsillectomy<br>Adenotomy<br>Appendectomy<br>Nephrolithiasis<br>Menopause<br>Arterial hypertension<br>Food allergy                                                                 | Unknown                | 35-40%          | No                             |
| H36 | Visium                                             | male   | 59y | 55kg   | 175cm   | Colorectal cancer with liver metastases                | Resection                    | Epipen (epinefrine) 0.3 mg if necessary                                                                                                                                                                                                                                                                                                                                                                                                                                                                                                                                                                                        | Diabetes mellitus type 2<br>Obstructive sleep apnea<br>Depression<br>Coronary artery disease<br>Arterial hypertension<br>Hypercholesterolemia                                       | 6 standard units daily | No              | mild pericellular & periportal |
| H37 | snRNA-seq<br>Visium                                | male   | 58y | 118kg  | 176cm   | Obesity class 2                                        | Gastric Bypass               | Asaflow (Acetylsalicylic acid) 80 mg daily<br>Olmotec (olmesartan/medoxomi) 40/25 mg daily<br>Bisoprolol 10 mg daily<br>Metformin 850 mg three times daily<br>Pantoprazol 40 mg daily<br>Atorvastatine 40 mg daily<br>Nortrilen (Nortriptyline) 25 mg three times daily<br>Baclofen 5 mg three times daily<br>Paracetamol 1 g three times daily<br>Pregabalin 300 mg twice daily<br>Sulpiride 50 mg twice daily                                                                                                                                                                                                                | Diabetes mellitus type 2<br>Obstructive sleep apnea<br>Depression<br>Coronary artery disease<br>Arterial hypertension<br>Hypercholesterolemia                                       | Unknown                | 70%             | Clear pericellular fibrosis    |
| H38 | snRNA-seq<br>Visium                                | female | 68y | 95kg   | 174cm   | Symptomatic cholecystolithiasis                        | Cholecystectomy              | /                                                                                                                                                                                                                                                                                                                                                                                                                                                                                                                                                                                                                              | Obesity                                                                                                                                                                             | Unknown                | 10%             | Mild pericellular fibrosis     |
